# Supplementary material for: Efficient modification of peroxydisulfate oxidation reactions of nitrogen-containing heterocycles 6-methyluracil and pyridine
Source: publisher site journal article supplement (doi:10.3762/bjoc.20.219), 2024-10-16
Supplement: Additional file 1 [file 1860-5397-20-219-S1.pdf]

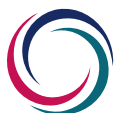

## Supporting Information

for

### Efficient modification of peroxydisulfate oxidation reactions of nitrogen-containing heterocycles 6-methyluracil and pyridine

Alfiya R. Gimadieva, Yuliya Z. Khazimullina, Aigiza A. Gilimkhanova  
and Akhat G. Mustafin

*Beilstein J. Org. Chem.* **2024**, *20*, 2599–2607. [doi:10.3762/bjoc.20.219](https://doi.org/10.3762/bjoc.20.219)

### NMR spectra of compounds 2, 3, and 6

The spectral characteristics of compounds **2**, **3**, **5**, **6** are given in [1], compound **9** - in [2].

### 6-Methyluracil-5-ammonium sulfate (**2**)

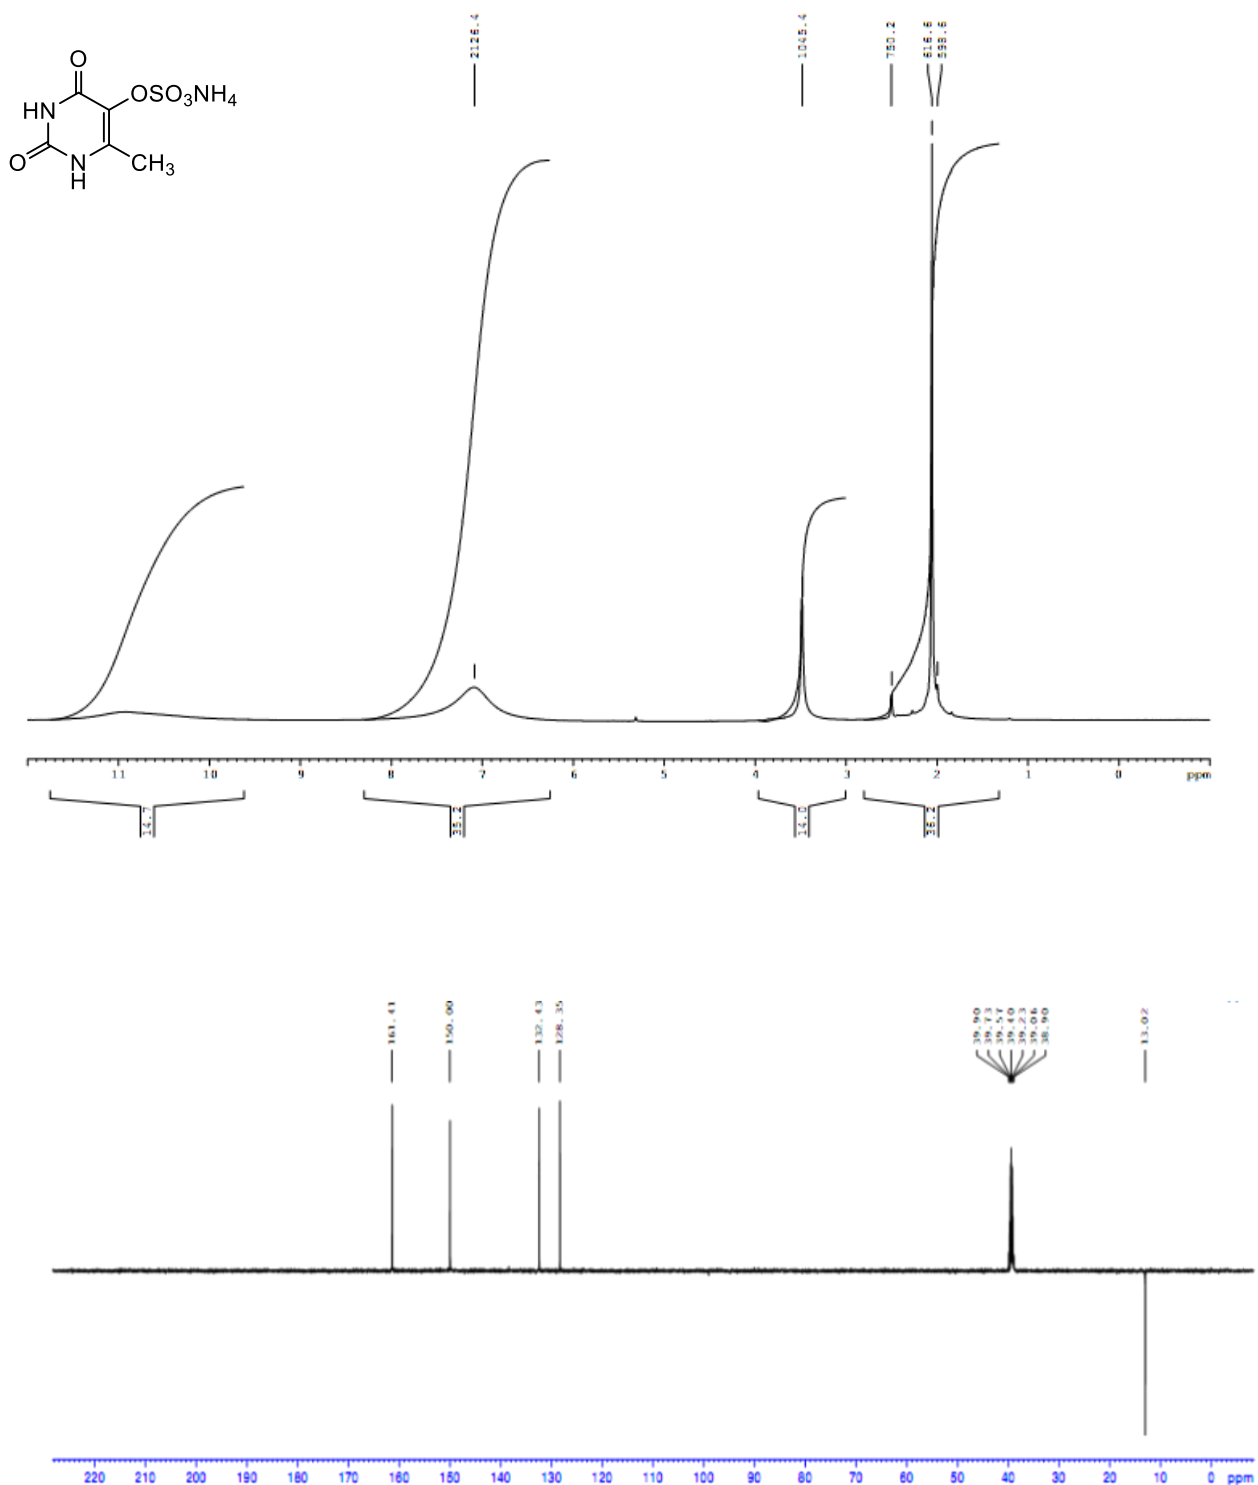

### 5-Hydroxy-6-methyluracil (3)

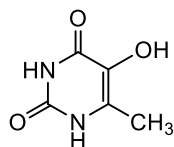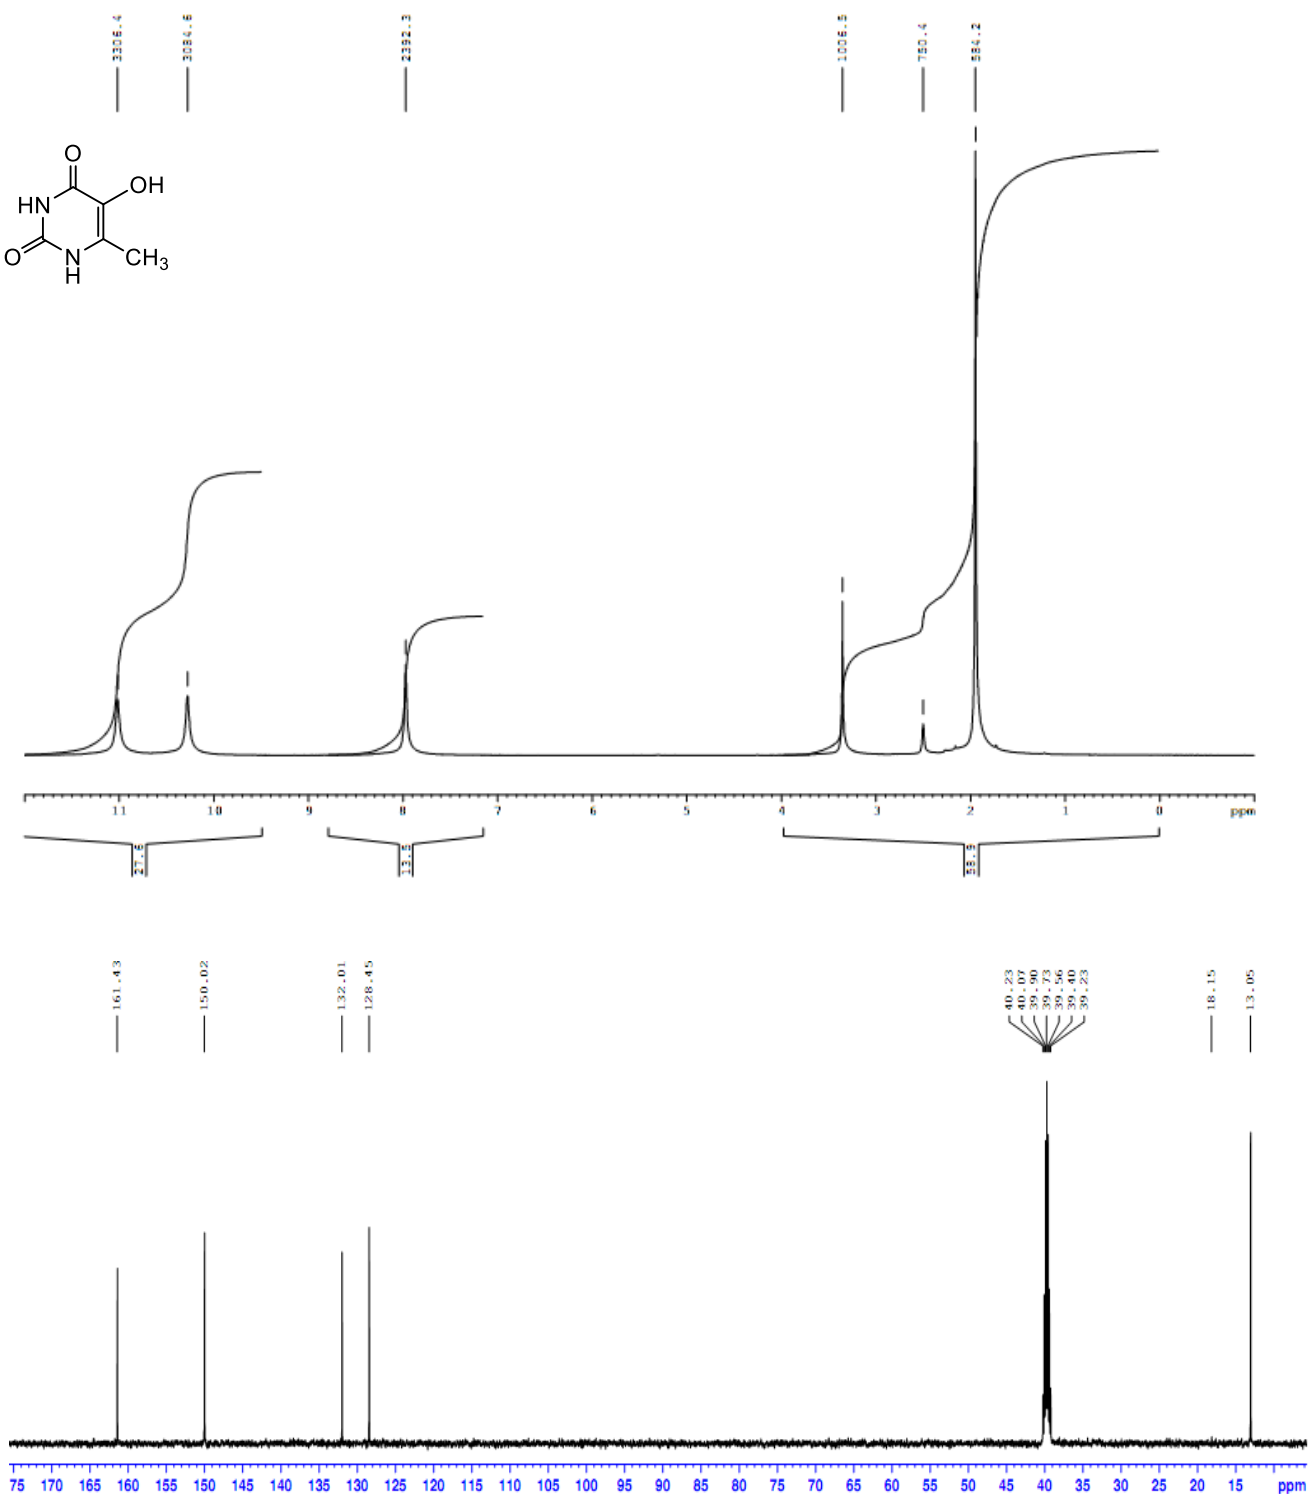

# 5-Hydroxy-1,3,6-trimethyluracil (6)

SW1101=19.99ppm d1(121)=7.88ppm Obs.Freq.:500.136MHz D1=0.0s T=298.5K Probe:BB0 Exp.Time: 7 sec TimeDate: 22/26/03 02 Feb 2023.

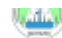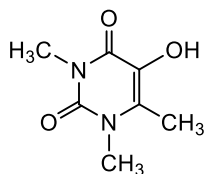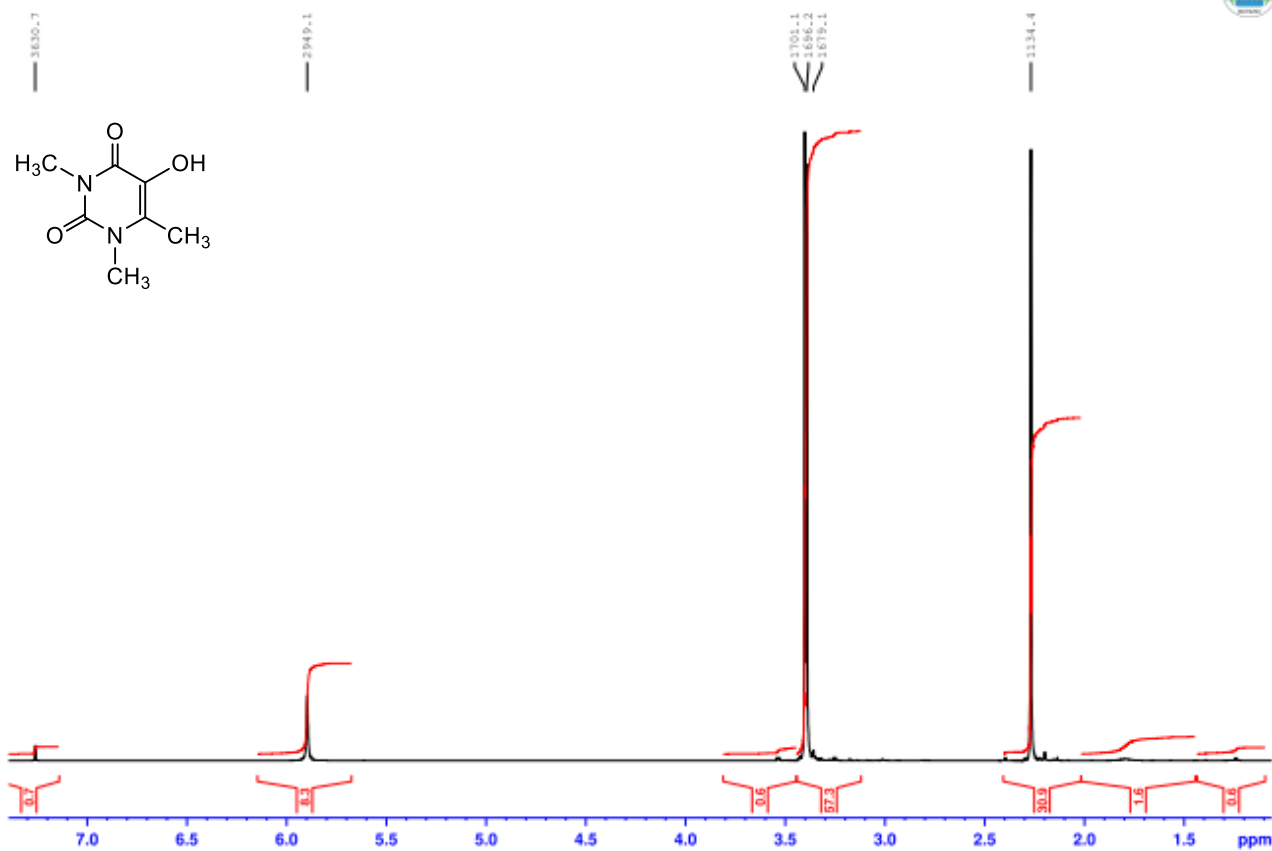

SW1205=236.62ppm d1(120)=110.50ppm Obs.Freq.:125.76MHz D1=0.0s T=298.6K Probe:AB0 Exp.Time: 4 min 24 sec TimeDate: 22/27/03 02 Feb 2023.

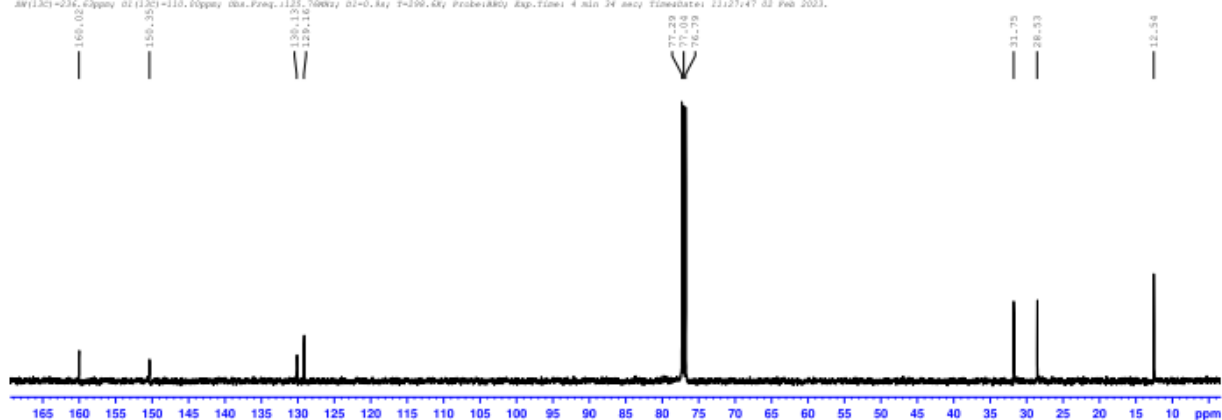

## References

1. Gimadieva, A. R.; Khazimullina, Yu. Z.; Abdrakhmanov, I. B.; Mustafin, A. G. *Russ. J. Appl. Chem.*, **2022**, 95, 436-441. DOI: 10.31857/S0044461822030112.
2. Forlani, L.; Cristoni, G.; Boga, C.; Todesco, P.E.; Del Vecchio, E.; Selva, S.; Monari, M. *Arkivoc*, **2002**, **11**, 198-215. DOI: 10.3998/ark.5550190.0003.b18.
